# Supplementary material
Source: PubMed Central journal article supplement (PMC4654059)
Supplement: supp_ddv408_ddv408supp.pdf [file supp_ddv408_ddv408supp.pdf]

## Legends to Supplementary Figures

**Fig. S1. SDS-polyacrylamide gel demonstrating the purity of the MutS $\beta$  preparation.** MutS $\beta$  was purified as described in the Materials and Methods and the purity of the preparation examined by electrophoresis after Mono Q and Superdex-200 chromatography.

**Fig. S2. The effect of BSA or MutS $\beta$  on the denaturation of a (CCG)<sub>10</sub> oligonucleotide fit a two-state model.** Melting curves produced on thermal denaturation of a (CCG)<sub>10</sub> oligonucleotide labeled at the 5' end with ROX<sup>TM</sup> and at the 3' end with IOWA Black<sup>®</sup> RQ. The intensity of fluorescence of the ROX<sup>TM</sup> donor was plotted against temperature in the presence of BSA or MutS $\beta$ . Dots represent the experimental data and solid lines are the best-fits according to the two-state model. The panels on the right show the distribution of residuals.

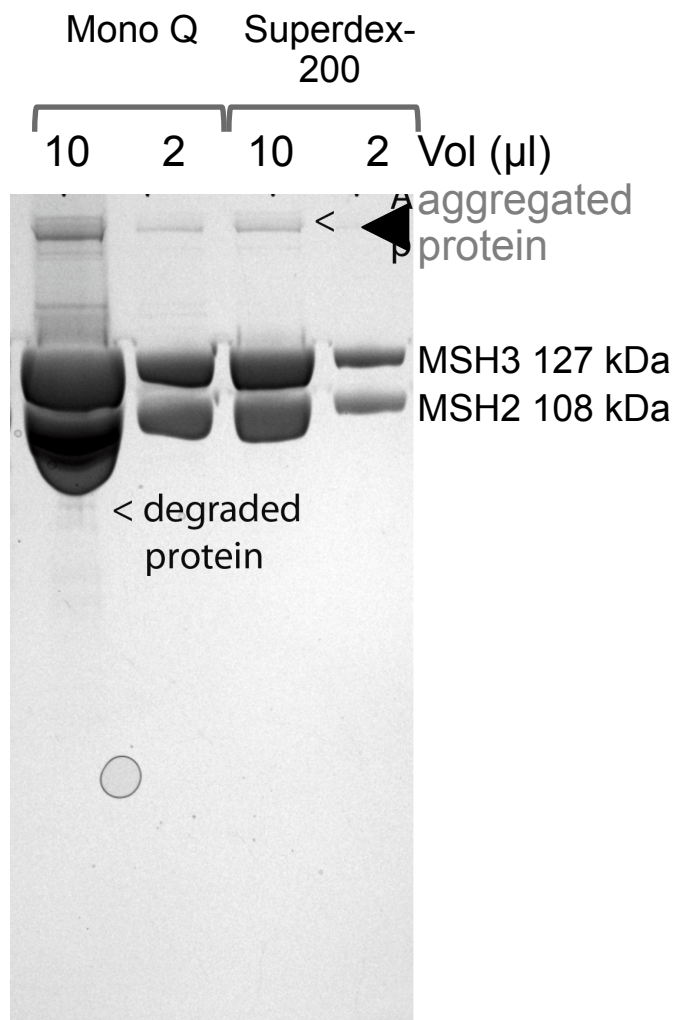

Fig. S1

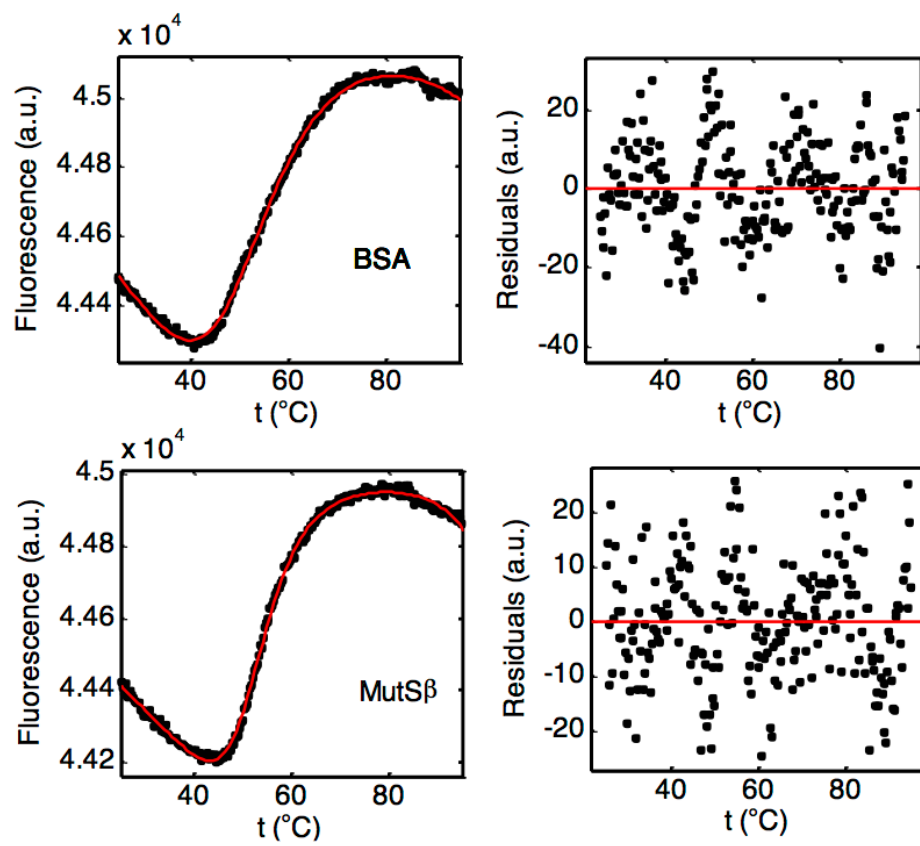

Fig. S2
